# Supplementary material
Source: publisher figshare collection journal article supplement (https://sage.figshare.com/ndownloader/files/22386594)
Supplement: Supplementary file 1 [file 22386594]

Labbé, Trost, & Grandjean (2020) Affective experiences to chords are modulated by mode, meter, tempo, and subjective entrainment.

Musical questionnaire

Name, Last Name:

Email address:

**You'll find several musical activities. Please indicate with what frequency you take part in each of these (never or rarely – sometimes – often – frequently).**

Chose the appropriate answer for each element:

|                                                                                    | Never or rarely          | Sometimes                | Often                    | Frequently               |
|------------------------------------------------------------------------------------|--------------------------|--------------------------|--------------------------|--------------------------|
| Play an instrument or sing professionally.                                         | <input type="checkbox"/> | <input type="checkbox"/> | <input type="checkbox"/> | <input type="checkbox"/> |
| Play an instrument or sing as an amateur (hobby).                                  | <input type="checkbox"/> | <input type="checkbox"/> | <input type="checkbox"/> | <input type="checkbox"/> |
| Practice or study to become a professional musician.                               | <input type="checkbox"/> | <input type="checkbox"/> | <input type="checkbox"/> | <input type="checkbox"/> |
| Go to classical music concerts.                                                    | <input type="checkbox"/> | <input type="checkbox"/> | <input type="checkbox"/> | <input type="checkbox"/> |
| Go to the opera.                                                                   | <input type="checkbox"/> | <input type="checkbox"/> | <input type="checkbox"/> | <input type="checkbox"/> |
| Go to jazz concerts.                                                               | <input type="checkbox"/> | <input type="checkbox"/> | <input type="checkbox"/> | <input type="checkbox"/> |
| Go to pop, rock, techno, etc. concerts                                             | <input type="checkbox"/> | <input type="checkbox"/> | <input type="checkbox"/> | <input type="checkbox"/> |
| Listen to recorded classical music (radio/TV, CD, DVD, mini player).               | <input type="checkbox"/> | <input type="checkbox"/> | <input type="checkbox"/> | <input type="checkbox"/> |
| Listen to recorded pop, rock, techno, etc, music (radio/TV, CD, DVD, mini player). | <input type="checkbox"/> | <input type="checkbox"/> | <input type="checkbox"/> | <input type="checkbox"/> |
| Listen to recorded jazz music (radio/TV, CD, DVD, mini player).                    | <input type="checkbox"/> | <input type="checkbox"/> | <input type="checkbox"/> | <input type="checkbox"/> |
| Listen to music while doing something else.                                        | <input type="checkbox"/> | <input type="checkbox"/> | <input type="checkbox"/> | <input type="checkbox"/> |

Labbé, Trost, & Grandjean (2020) Affective experiences to chords are modulated by mode, meter, tempo, and subjective entrainment.

Musical questionnaire

**You will find below a number of statements about your musical skills and your behavior towards music. Please indicate for each statement how much you agree (strongly disagree - disagree - agree - strongly agree).**

Choose the appropriate answer for each item:

|                                                                                             | <b>Strongly<br/>disagree</b> | <b>Disagree</b>          | <b>Agree</b>             | <b>Strongly<br/>agree</b> |
|---------------------------------------------------------------------------------------------|------------------------------|--------------------------|--------------------------|---------------------------|
| I adore music.                                                                              | <input type="checkbox"/>     | <input type="checkbox"/> | <input type="checkbox"/> | <input type="checkbox"/>  |
| Listening to music is one of my favorite activities.                                        | <input type="checkbox"/>     | <input type="checkbox"/> | <input type="checkbox"/> | <input type="checkbox"/>  |
| I consider myself to be musically cultured.                                                 | <input type="checkbox"/>     | <input type="checkbox"/> | <input type="checkbox"/> | <input type="checkbox"/>  |
| I find it's difficult to concentrate without listening to music.                            | <input type="checkbox"/>     | <input type="checkbox"/> | <input type="checkbox"/> | <input type="checkbox"/>  |
| I am talented (musically speaking).                                                         | <input type="checkbox"/>     | <input type="checkbox"/> | <input type="checkbox"/> | <input type="checkbox"/>  |
| I consider myself to have a musical ear.                                                    | <input type="checkbox"/>     | <input type="checkbox"/> | <input type="checkbox"/> | <input type="checkbox"/>  |
| I know how to sing.                                                                         | <input type="checkbox"/>     | <input type="checkbox"/> | <input type="checkbox"/> | <input type="checkbox"/>  |
| I know how to play one or several musical instruments.                                      | <input type="checkbox"/>     | <input type="checkbox"/> | <input type="checkbox"/> | <input type="checkbox"/>  |
| When I listen to my favorite piece of music, I am very focused.                             | <input type="checkbox"/>     | <input type="checkbox"/> | <input type="checkbox"/> | <input type="checkbox"/>  |
| I do not understand people who are constantly listening to music on mini-players.           | <input type="checkbox"/>     | <input type="checkbox"/> | <input type="checkbox"/> | <input type="checkbox"/>  |
| I think playing or listening to music is a waste of time.                                   | <input type="checkbox"/>     | <input type="checkbox"/> | <input type="checkbox"/> | <input type="checkbox"/>  |
| Listening to music fills me with emotion.                                                   | <input type="checkbox"/>     | <input type="checkbox"/> | <input type="checkbox"/> | <input type="checkbox"/>  |
| When I listen to music, I try to understand what the composer wants to convey.              | <input type="checkbox"/>     | <input type="checkbox"/> | <input type="checkbox"/> | <input type="checkbox"/>  |
| I sometimes compose music.                                                                  | <input type="checkbox"/>     | <input type="checkbox"/> | <input type="checkbox"/> | <input type="checkbox"/>  |
| I can very well do things without listening to music.                                       | <input type="checkbox"/>     | <input type="checkbox"/> | <input type="checkbox"/> | <input type="checkbox"/>  |
| What I like about singing is the musical expression of emotions transmitted by the singers. | <input type="checkbox"/>     | <input type="checkbox"/> | <input type="checkbox"/> | <input type="checkbox"/>  |

Musical questionnaire

Labbé, Trost, & Grandjean (2020) Affective experiences to chords are modulated by mode, meter, tempo, and subjective entrainment.

**Below you will find a number of typical music listening experiences. For each statement, please indicate how often you have felt these sensations (never or rarely - sometimes - often - frequently).**

**When I listen to some music:**

Choose the appropriate answer for each item:

|                                              | Never or rarely          | Sometimes                | Often                    | Frequently               |
|----------------------------------------------|--------------------------|--------------------------|--------------------------|--------------------------|
| I experience strong emotions.                | <input type="checkbox"/> | <input type="checkbox"/> | <input type="checkbox"/> | <input type="checkbox"/> |
| I feel feelings of reverence and elevation.  | <input type="checkbox"/> | <input type="checkbox"/> | <input type="checkbox"/> | <input type="checkbox"/> |
| I calm down and relax.                       | <input type="checkbox"/> | <input type="checkbox"/> | <input type="checkbox"/> | <input type="checkbox"/> |
| I feel a stimulating effect on me.           | <input type="checkbox"/> | <input type="checkbox"/> | <input type="checkbox"/> | <input type="checkbox"/> |
| I become aggressive or confrontational.      | <input type="checkbox"/> | <input type="checkbox"/> | <input type="checkbox"/> | <input type="checkbox"/> |
| I move my body or tap my foot.               | <input type="checkbox"/> | <input type="checkbox"/> | <input type="checkbox"/> | <input type="checkbox"/> |
| I have trouble suppressing my desire to hum. | <input type="checkbox"/> | <input type="checkbox"/> | <input type="checkbox"/> | <input type="checkbox"/> |
| I have chills or goosebumps.                 | <input type="checkbox"/> | <input type="checkbox"/> | <input type="checkbox"/> | <input type="checkbox"/> |
| I have had tears in my eyes.                 | <input type="checkbox"/> | <input type="checkbox"/> | <input type="checkbox"/> | <input type="checkbox"/> |
| I have to fight boredom.                     | <input type="checkbox"/> | <input type="checkbox"/> | <input type="checkbox"/> | <input type="checkbox"/> |
| I experience extremely pleasant sensations.  | <input type="checkbox"/> | <input type="checkbox"/> | <input type="checkbox"/> | <input type="checkbox"/> |
| I am deeply touched.                         | <input type="checkbox"/> | <input type="checkbox"/> | <input type="checkbox"/> | <input type="checkbox"/> |
| My mood improves.                            | <input type="checkbox"/> | <input type="checkbox"/> | <input type="checkbox"/> | <input type="checkbox"/> |
| I think of something else.                   | <input type="checkbox"/> | <input type="checkbox"/> | <input type="checkbox"/> | <input type="checkbox"/> |
